# Supplementary material for: A Phase 2 Single-Arm Study of Osimertinib for Radiotherapy-Naive Central Nervous System Metastasis NSCLC: Results for the First-Line Cohort of the OCEAN Study (LOGIK 1603/WJOG 9116L)
Source: PubMed Central journal article supplement (PMC10689268; doi:10.1016/j.jtocrr.2023.100587), 2023-10-12

## Supplementary Figure 1

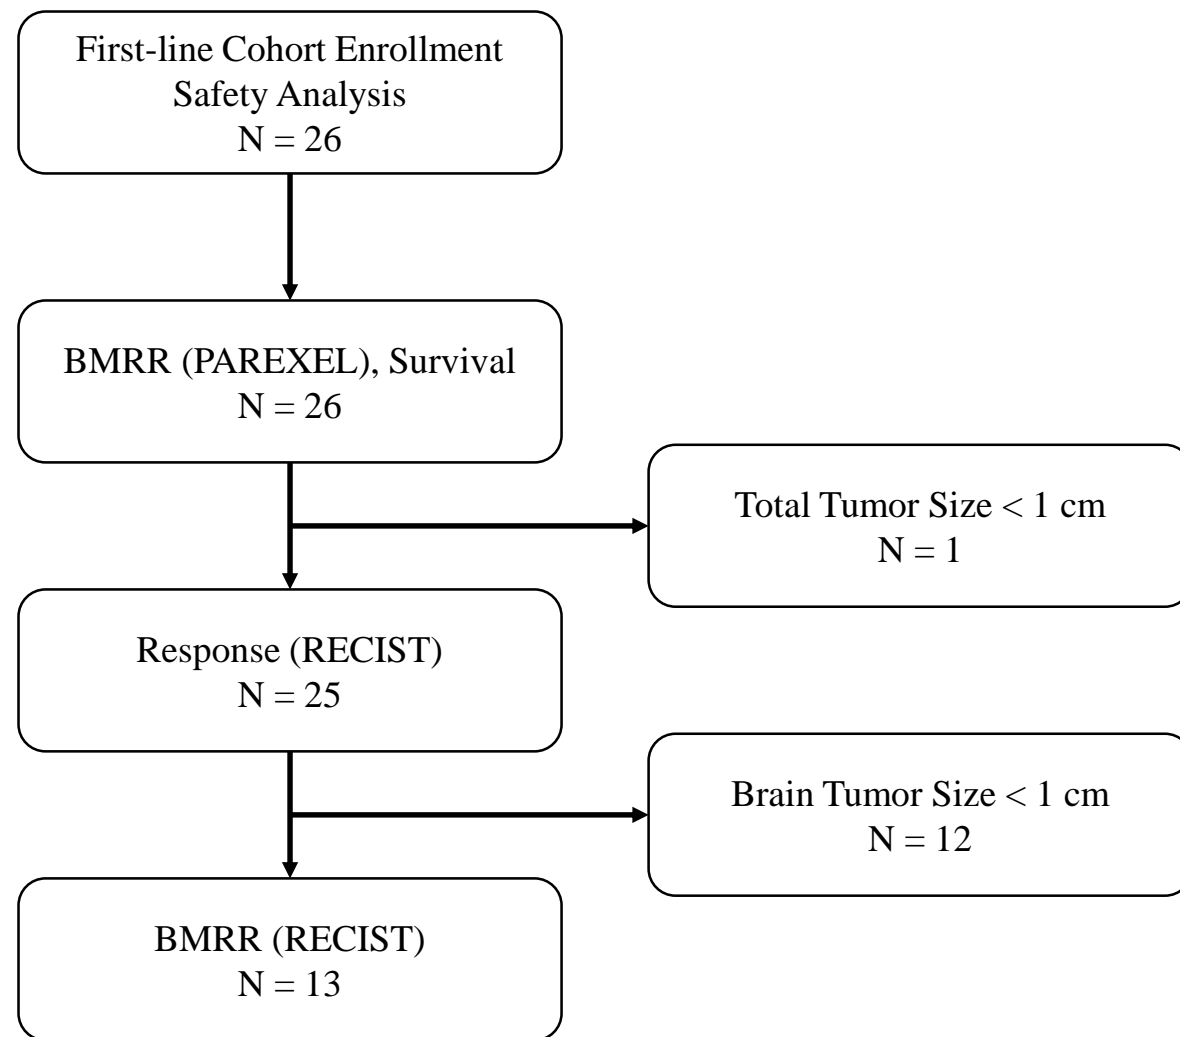

Supplement: mmc1.pdf [file mmc1.pdf]
